# Supplementary material
Source: MDPI journal article supplement (https://www.mdpi.com/2073-4441/7/1/132)
Supplement: s1 [file s1]

# Supplementary Information

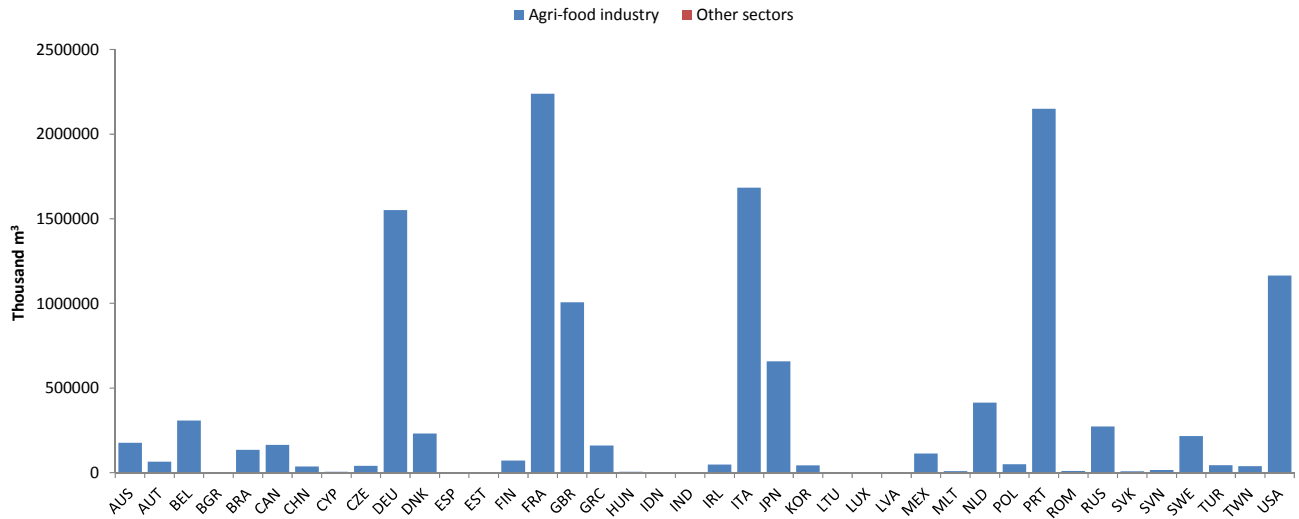

(a)

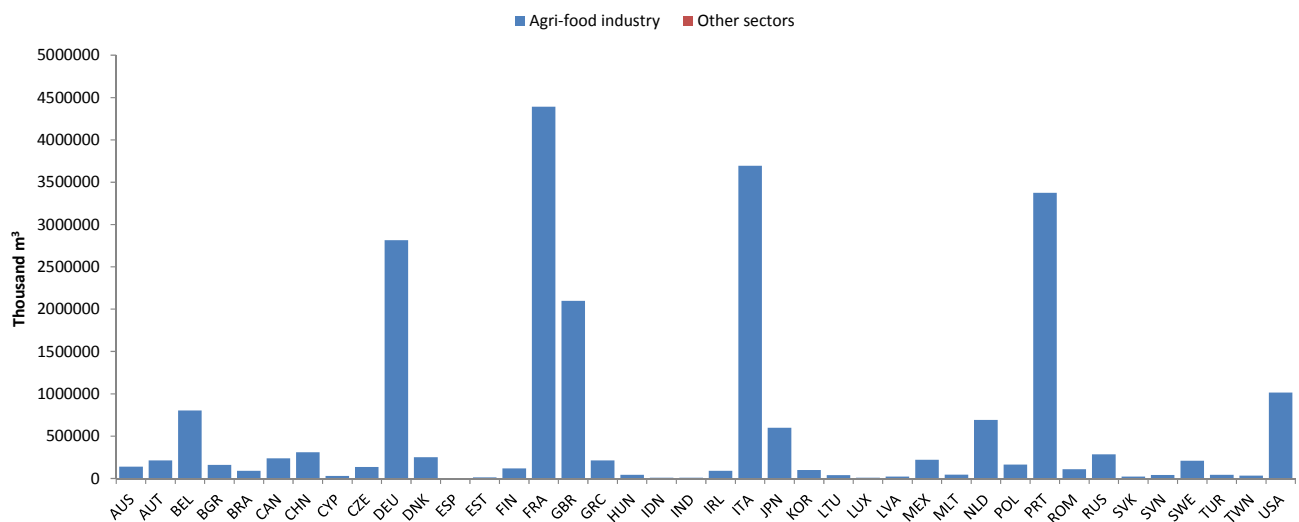

(b)

**Figure S1.** Green virtual water exports of the agri-food sector by country and sector in 1995 (a) and 2009 (b), thousand m<sup>3</sup>.

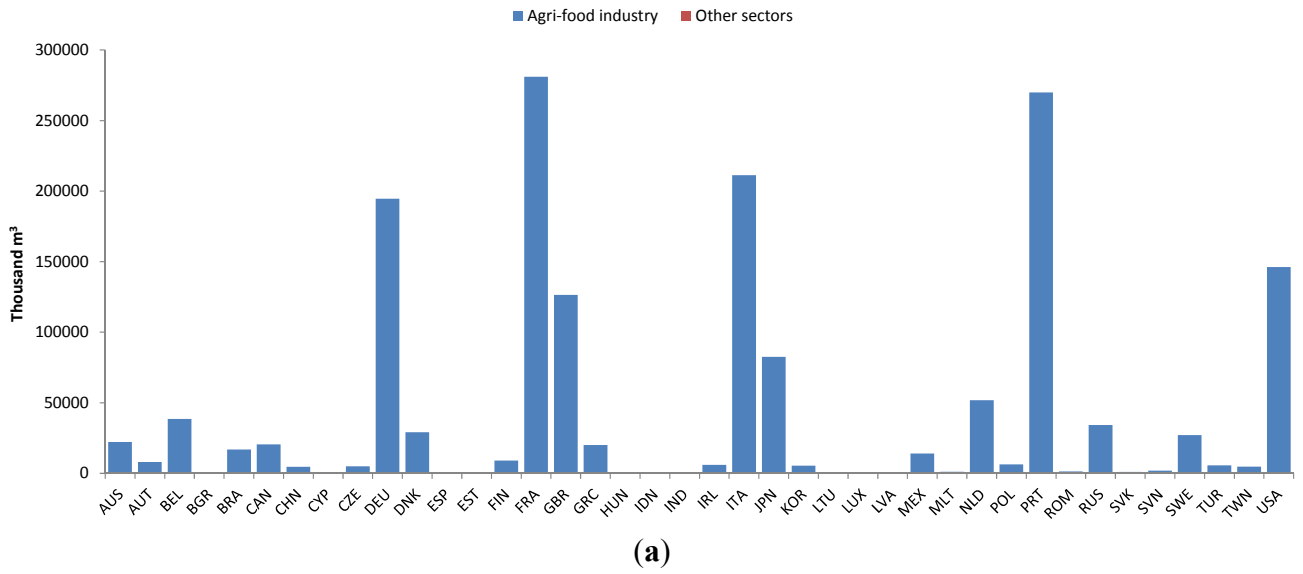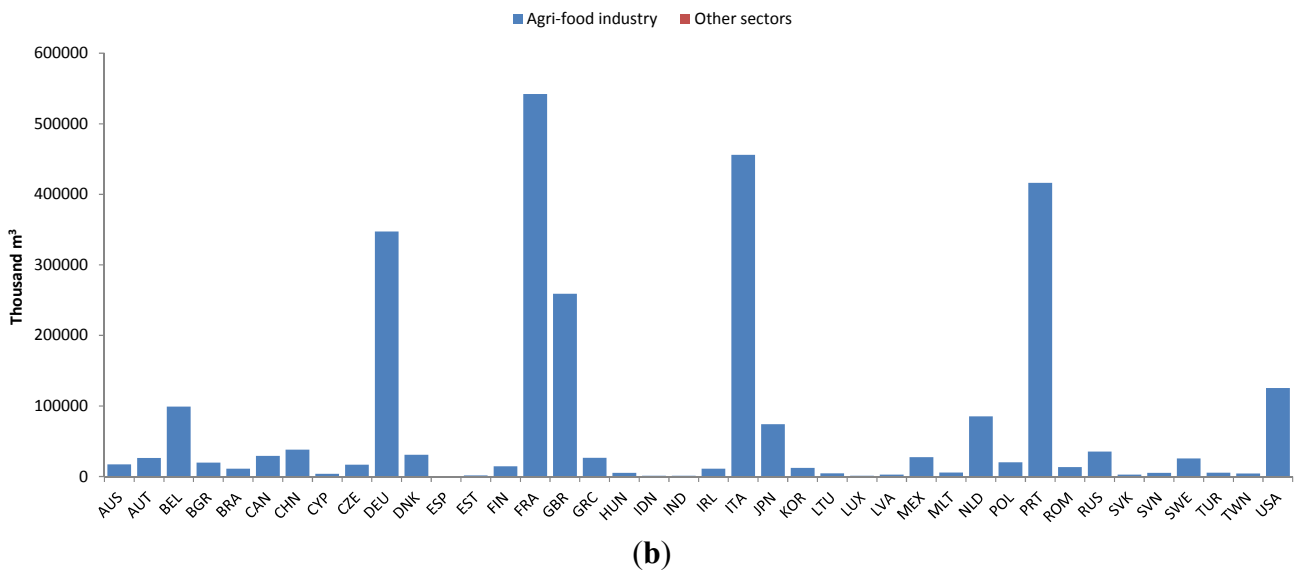

**Figure S2.** Grey virtual water exports of the agri-food sector by country and sector in 1995 (a) and 2009 (b), thousand m<sup>3</sup>.

**Table S1.** Components of water embodied in trade flows of the Spanish agri-food sector, million m<sup>3</sup>.

|                                                                                                            | 1995          |               |               | 2009          |               |               | 1995–2009    |               |              |
|------------------------------------------------------------------------------------------------------------|---------------|---------------|---------------|---------------|---------------|---------------|--------------|---------------|--------------|
|                                                                                                            | Blue          | Green         | Grey          | Blue          | Green         | Grey          | Blue         | Green         | Grey         |
| <b>Water embodied in exports to other countries</b>                                                        | <b>2899</b>   | <b>17,092</b> | <b>2145</b>   | <b>4243</b>   | <b>25,493</b> | <b>3171</b>   | <b>1344</b>  | <b>8401</b>   | <b>1026</b>  |
| Domestic water embodied in agri-food inputs that are exported                                              | 1             | 0             | 0             | 1             | 0             | 0             | 0            | 0             | 0            |
| Domestic water embodied in agri-food inputs that are exported and then re-imported as outputs              | 0             | 0             | 0             | 0             | 0             | 0             | 0            | 0             | 0            |
| Domestic water embodied in agri-food outputs that are exported                                             | 1             | 0             | 0             | 1             | 0             | 0             | 0            | 0             | 0            |
| Domestic water embodied in non-agri-food inputs used to produce agri-food output that are exported         | 2671          | 15,038        | 1920          | 3910          | 21,902        | 2797          | 1239         | 6864          | 878          |
| Import of water embodied in foreign agri-food inputs that are re-exported as final agri-food output        | 227           | 2054          | 226           | 331           | 3591          | 374           | 104          | 1537          | 148          |
| <b>Water embodied in imports from other countries</b>                                                      | <b>3252</b>   | <b>30,879</b> | <b>3282</b>   | <b>4350</b>   | <b>43,242</b> | <b>4632</b>   | <b>1098</b>  | <b>12,363</b> | <b>1350</b>  |
| Import of water embodied in foreign agri-food inputs to produce agri-food output consumed domestically     | 1196          | 10,835        | 1191          | 975           | 10,586        | 1103          | −221         | −249          | −89          |
| Domestic water embodied in agri-food and non-agri-food inputs exported and re-imported as agri-food output | 7             | 38            | 5             | 40            | 227           | 29            | 33           | 189           | 24           |
| Import of water embodied in foreign agri-food output                                                       | 1823          | 17,953        | 1860          | 3004          | 28,839        | 3127          | 1181         | 10,886        | 1267         |
| Import of water embodied in foreign agri-food inputs and re-exported as final agri-food output             | 227           | 2054          | 226           | 331           | 3591          | 374           | 104          | 1537          | 148          |
| <b>Water embodied in sales to other Spanish sectors that produce outputs</b>                               | <b>16</b>     | <b>0</b>      | <b>0</b>      | <b>22</b>     | <b>0</b>      | <b>0</b>      | <b>6</b>     | <b>0</b>      | <b>0</b>     |
| for domestic consumption                                                                                   | 11            | 0             | 0             | 13            | 0             | 0             | 2            | 0             | 0            |
| for exports                                                                                                | 5             | 0             | 0             | 9             | 0             | 0             | 4            | 0             | 0            |
| <b>Water embodied in purchases from other Spanish sectors used to produce agri-food outputs</b>            | <b>16,762</b> | <b>94,383</b> | <b>12,047</b> | <b>15,437</b> | <b>86,475</b> | <b>11,044</b> | <b>−1325</b> | <b>−7908</b>  | <b>−1004</b> |
| for domestic consumption                                                                                   | 14,092        | 79,344        | 10,128        | 11,527        | 64,572        | 8247          | −2565        | −14,772       | −1881        |
| for exports                                                                                                | 2671          | 15,038        | 1920          | 3910          | 21,902        | 2797          | 1239         | 6864          | 878          |
